# Supplementary material
Source: publisher figshare collection journal article supplement (https://future-science-group.figshare.com/ndownloader/files/33970424)
Supplement: Supplementary file 1 [file 33970424]

| **Study** | **RISK OF BIAS** | | | | **APPLICABILITY CONCERNS** | | |
| --- | --- | --- | --- | --- | --- | --- | --- |
| **Patient selection** | **Index test** | **Reference standard** | **Flow and timing** | **Patient selection** | **Index test** | **Reference standard** |

| Hamilton-Craig et al. | 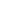 | 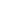 | 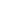 | 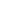 | 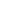 | 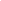 | 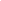 |
| --- | --- | --- | --- | --- | --- | --- | --- |
| Srichai et al. | 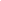 | 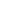 | 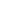 | 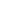 | 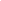 | 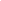 | 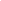 |
| Ghostine et al. | 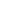 | 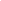 | 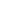 | 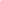 | 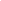 | 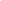 | 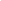 |
| Le Polain de  Waroux et al. | 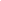 | 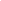 | 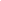 | 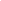 | 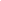 | 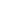 | 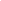 |
| Boulmier et al. | 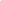 | 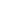 | 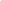 | 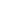 | 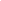 | 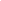 | 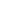 |


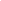
Low Risk
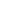
High Risk
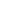
Unclear Risk

Supplementary Table I: Quality assessment of included studies using the QUADAS-2 tool

QUADAS: Quality Assessment of Diagnostic Accuracy Studies
